# Supplementary material
Source: ML conference proceedings conference paper supplement (https://proceedings.mlr.press/v97/yao19a.html)
Supplement: Supplementary file [file yao19a-supp.pdf]

## A. Example Nonconvex Regularizers

Common nonconvex regularizers include capped- $\ell_1$  norm (Zhang, 2010b), log-sum-penalty (LSP) (Candès et al., 2008), truncated nuclear norm (TNN) (Hu et al., 2013), smoothed-capped-absolute-deviation (SCAD) (Fan & Li, 2001) and minimax concave penalty (MCP) (Zhang, 2010a). Their definitions are in Table 7 below.

Table 7. Common examples of  $\kappa(\sigma_i(\mathbf{X}))$ . Here,  $\theta$  is a constant. For capped- $\ell_1$ , LSP and MCP,  $\theta > 0$ ; for SCAD,  $\theta > 2$ ; and for TNN,  $\theta$  is a positive integer.

|                                 | $\kappa(\sigma_i(\mathbf{X}))$                                                                                                                                                                                                                                           |
|---------------------------------|--------------------------------------------------------------------------------------------------------------------------------------------------------------------------------------------------------------------------------------------------------------------------|
| capped- $\ell_1$ (Zhang, 2010b) | $\min(\sigma_i(\mathbf{X}), \theta)$                                                                                                                                                                                                                                     |
| LSP (Candès et al., 2008)       | $\log(\frac{1}{\theta}\sigma_i(\mathbf{X}) + 1)$                                                                                                                                                                                                                         |
| TNN (Hu et al., 2013)           | $\begin{cases} \sigma_i(\mathbf{X}) & \text{if } i > \theta \\ 0 & \text{otherwise} \end{cases}$                                                                                                                                                                         |
| SCAD (Fan & Li, 2001)           | $\begin{cases} \sigma_i(\mathbf{X}) & \text{if } \sigma_i(\mathbf{X}) \leq 1 \\ \frac{2\theta\sigma_i(\mathbf{X}) - \sigma_i(\mathbf{X})^2 - 1}{2(\theta-1)} & \text{if } 1 < \sigma_i(\mathbf{X}) \leq \theta \\ \frac{(\theta+1)^2}{2} & \text{otherwise} \end{cases}$ |
| MCP (Zhang, 2010a)              | $\begin{cases} \sigma_i(\mathbf{X}) - \frac{\alpha^2}{2\theta} & \text{if } \sigma_i(\mathbf{X}) \leq \theta \\ \frac{\theta^2}{2} & \text{otherwise} \end{cases}$                                                                                                       |

## B. Proofs

### B.1. Proposition 3.1

*Proof.* Since  $\phi$  is imposed on the unfolding matrix, (13) can be expressed as

$$\begin{aligned} \mathbf{Z}_t &= [\mathbf{z}_t]_{\langle i \rangle}, \\ \mathbf{Y}_{t+1}^i &= \text{prox}_{\frac{\lambda_i}{\tau}\phi}(\mathbf{z}_t), \quad i = 1, \dots, K, \\ \mathbf{x}_{t+1} &= \frac{1}{D} \sum_{d=1}^D [\mathbf{Y}_{t+1}^d]_{\langle d \rangle}. \end{aligned}$$

(9) can be equivalently rewritten as  $\mathbf{y}_{t+1}^i = \left[ \text{prox}_{\frac{\lambda_i}{\tau}\phi}([\mathbf{z}_t]_{\langle i \rangle}) \right]_{\langle i \rangle}$ .  $\square$

### B.2. Proposition 3.2

*Proof.* For simplicity of exposition, take  $\{\pi_1, \pi_2, \pi_3\} = \{1, 2, 3\}$ , and consider the case where  $\mathbf{U}$  (resp.  $\mathbf{V}$ ) has only one single column  $\mathbf{u}$  (resp.  $\mathbf{v}$ ).

We need to fold  $\mathbf{u}\mathbf{v}^\top$  along with the first mode and then unfold it along its second mode. In order to avoid the folding and unfolding operations, we consider the structure of  $\mathbf{X} = (\mathbf{u}\mathbf{v}^\top)_{\langle 1 \rangle}$ . Let  $\mathbf{v} = [\mathbf{v}_1; \dots; \mathbf{v}_{I_3}]$ , where each  $\mathbf{v}_i \in \mathbb{R}^{I_2}$ . As  $\mathbf{u} \in \mathbb{R}^{I_1}$  and  $\mathbf{v} \in \mathbb{R}^{I_2 I_3}$ , we have

$$\mathbf{x}_{:,i} = \mathbf{v}_i \mathbf{u}^\top.$$

When unfolding  $\mathbf{X}$  with the second mode, the unfolding matrix is

$$[\mathbf{v}_1 \mathbf{u}^\top, \dots, \mathbf{v}_{I_3} \mathbf{u}^\top] \in \mathbb{R}^{I_2 \times I_1 I_3}. \quad (21)$$

Thus,

$$\begin{aligned} \mathbf{a}^\top [\mathbf{v}_1 \mathbf{u}^\top, \dots, \mathbf{v}_{I_3} \mathbf{u}^\top] &= [(\mathbf{a}^\top \mathbf{v}_1) \mathbf{u}^\top, \dots, (\mathbf{a}^\top \mathbf{v}_{I_3}) \mathbf{u}^\top] \\ &= (\mathbf{a}^\top \text{mat}(\mathbf{v})) \otimes \mathbf{u}_p^\top. \end{aligned} \quad (22)$$

Let  $\mathbf{b} = [\mathbf{b}_1; \dots; \mathbf{b}_{I_3}]$ , where each  $\mathbf{b}_i \in \mathbb{R}^{I_1}$ . From (21), we have

$$\begin{aligned} &[\mathbf{v}_1 \mathbf{u}^\top, \dots, \mathbf{v}_{I_3} \mathbf{u}^\top] \mathbf{b} \\ &= \sum_{i=1}^{I_3} \mathbf{v}_i (\mathbf{u}^\top \mathbf{b}_i) \\ &= [\mathbf{v}_1; \dots; \mathbf{v}_{I_3}] \begin{bmatrix} \mathbf{u}^\top \mathbf{b}_1 \\ \vdots \\ \mathbf{u}^\top \mathbf{b}_{I_3} \end{bmatrix} \\ &= [\mathbf{v}_1; \dots; \mathbf{v}_{I_3}] [\mathbf{b}_1; \dots; \mathbf{b}_{I_3}]^\top \mathbf{u} \\ &= \text{mat}(\mathbf{v}) \text{mat}(\mathbf{b})^\top \mathbf{u}. \end{aligned} \quad (23)$$

When  $\mathbf{U}$  (resp.  $\mathbf{V}$ ) has  $p$  columns, combining with the fact that  $\mathbf{U}\mathbf{V}^\top = \sum_{p=1}^k \mathbf{u}_p \mathbf{v}_p^\top$  with (22) and (23), we obtain

$$\begin{aligned} \mathbf{a}^\top ((\mathbf{U}\mathbf{V}^\top)^{\langle 1 \rangle})_{\langle 2 \rangle} &= \sum_{p=1}^k \mathbf{u}_p^\top \otimes (\mathbf{a}^\top \text{mat}(\mathbf{v}_p)), \\ ((\mathbf{U}\mathbf{V}^\top)^{\langle 1 \rangle})_{\langle 2 \rangle} \mathbf{b} &= \sum_{p=1}^k \text{mat}(\mathbf{v}_p) \text{mat}(\mathbf{b})^\top \mathbf{u}_p. \end{aligned}$$

The proof does not rely on any specific order of  $\{I_1, I_2, I_3\}$ . Thus, we can take a permutation of them.  $\square$

### B.3. Proposition 3.3

*Proof.* Let  $\bar{\lambda}_i = \lambda_i / \tau$ . Then,

$$\begin{aligned} &\frac{1}{D} \sum_{d=1}^D \text{prox}_{\bar{\lambda}_d \phi}(\mathbf{z}_{\langle d \rangle}) \\ &= \min_{\{\mathbf{X}_d\}} \frac{1}{D} \sum_{d=1}^D \left[ \frac{1}{2} \|\mathbf{X}_d - \mathbf{z}_{\langle d \rangle}\|_F^2 + \bar{\lambda}_d \phi(\mathbf{X}_d) \right] \\ &= \min_{\{\mathbf{X}_d\}} \frac{1}{2} \|\mathbf{z}\|_F^2 - \left\langle \mathbf{z}, \frac{1}{D} \sum_{d=1}^D \mathbf{X}_d^{(d)} \right\rangle + \frac{1}{2D} \sum_{d=1}^D \|\mathbf{X}_d\|_F^2 \\ &\quad + \frac{1}{D} \sum_{d=1}^D \bar{\lambda}_d \phi(\mathbf{X}_d) \\ &= \min_{\{\mathbf{X}_d\}} \frac{1}{2} \left\| \mathbf{z} - \frac{1}{D} \sum_{d=1}^D \mathbf{X}_d^{(d)} \right\|_F^2 - \frac{1}{2} \left\| \sum_{d=1}^D \frac{1}{D} \mathbf{X}_d^{(d)} \right\|_F^2 \\ &\quad + \sum_{d=1}^D \frac{1}{D} \left[ \frac{1}{2} \|\mathbf{X}_d^{(d)}\|_F^2 + \bar{\lambda}_d \phi(\mathbf{X}_d) \right]. \end{aligned} \quad (24)$$

Let  $\mathbf{X} = \frac{1}{D} \sum_{d=1}^D \mathbf{X}_d^{(d)}$ . We transform (24) as

$$\min_{\mathbf{X}} \frac{1}{2} \|\mathbf{Z} - \mathbf{X}\|_F^2 + \frac{1}{\tau} \bar{g}(\mathbf{X}) = \text{prox}_{\frac{1}{\tau} \bar{g}}(\mathbf{X}),$$

where  $\bar{g}(\mathbf{X})$  is implicitly defined as

$$\begin{aligned} \bar{g}(\mathbf{X}) &= \min_{\{\mathbf{X}_d\}} \frac{\tau}{D} \sum_{d=1}^D \left[ \frac{1}{2} \|\mathbf{X}_d^{(d)}\|_F^2 + \bar{\lambda}_d \phi(\mathbf{X}_d) \right] - \frac{\tau}{2} \|\mathbf{X}\|_F^2 \\ \text{s.t. } & \frac{1}{D} \sum_{d=1}^D \mathbf{X}_d^{(d)} = \mathbf{X}. \end{aligned} \quad (25)$$

Thus,  $\text{prox}_{\frac{1}{\tau} \bar{g}}(\mathbf{Z}) = \frac{1}{D} \sum_{i=1}^D \left[ \text{prox}_{\bar{\lambda}_d \phi}([\mathbf{Z}]_{(i)}) \right]^{(i)}$ .  $\square$

#### B.4. Proposition 3.4

Let  $g(\mathbf{X}) = \sum_{d=1}^D \frac{\lambda_d}{D} \phi(\mathbf{X}_{(d)})$ . Before proving Proposition 3.4, we first extend Proposition 2 in (Zhong & Kwok, 2014) in the following Lemma.

**Lemma B.1.**  $0 \leq g(\mathbf{X}) - \bar{g}(\mathbf{X}) \leq \frac{L^2}{2\tau D} \sum_{d=1}^D \lambda_d^2$ .

*Proof.* From the definition of  $\bar{g}$  in (25), if  $\mathbf{X} = \mathbf{X}_1^{(1)} = \dots = \mathbf{X}_D^{(D)}$ , we have

$$\begin{aligned} \bar{g}(\mathbf{X}) &\leq \frac{\tau}{D} \sum_{d=1}^D \left[ \frac{1}{2} \|\mathbf{X}_d^{(d)}\|_F^2 + \bar{\lambda}_d \phi(\mathbf{X}_d) \right] - \frac{\tau}{2} \|\mathbf{X}\|_F^2 \\ &= \frac{1}{D} \sum_{d=1}^D \lambda_d \phi(\mathbf{X}_d) = \frac{1}{D} \sum_{d=1}^D \lambda_d \phi(\mathbf{X}_{(d)}) = g(\mathbf{X}). \end{aligned}$$

Thus,  $g(\mathbf{X}) - \bar{g}(\mathbf{X}) \geq 0$ .

Next, we prove the “ $\leq$ ” part in the Lemma. Note that

$$\begin{aligned} & \sup_{\mathbf{X}_d} \lambda_d \phi(\mathbf{X}_d) - \tau \text{prox}_{\bar{\lambda}_d \phi}(\mathbf{X}_d^{(d)}) \\ &= \sup_{\mathbf{X}_d} \lambda_d \phi(\mathbf{X}_d) - \tau \min_{\mathbf{X}} \left[ \frac{1}{2} \|\mathbf{X} - \mathbf{X}_d^{(d)}\|_F^2 + \bar{\lambda}_d \phi(\mathbf{X}) \right] \\ &= \sup_{\mathbf{X}_d, \mathbf{X}} \lambda_d \phi(\mathbf{X}_d) - \frac{\tau}{2} \|\mathbf{X} - \mathbf{X}_d^{(d)}\|_F^2 - \lambda_d \phi(\mathbf{X}). \end{aligned} \quad (26)$$

Since  $\phi$  is  $L$ -Lipschitz continuous, let  $\alpha = \|\mathbf{X} - \mathbf{X}_d^{(d)}\|_F$ , we have

$$\begin{aligned} (26) &= \sup_{\mathbf{X}_d, \mathbf{X}} \lambda_d [\phi(\mathbf{X}_d) - \phi(\mathbf{X})] - \frac{\tau}{2} \|\mathbf{X} - \mathbf{X}_d^{(d)}\|_F^2 \\ &\leq \sup_{\mathbf{X}_d, \mathbf{X}} \lambda_d L \|\mathbf{X} - \mathbf{X}_d^{(d)}\|_F - \frac{\tau}{2} \|\mathbf{X} - \mathbf{X}_d^{(d)}\|_F^2 \\ &= \sup_{\alpha} \left[ \lambda_d L \alpha - \frac{\tau}{2} \alpha^2 \right] \\ &= \sup_{\alpha} -\frac{1}{2} \left[ \alpha - \frac{\lambda_d L}{\tau} \right]^2 + \frac{\lambda_d^2 L^2}{2} \leq \frac{\lambda_d^2 L^2}{2\tau}. \end{aligned} \quad (27)$$

Next, we have

$$\begin{aligned} g(\mathbf{X}) - \bar{g}(\mathbf{X}) &\leq g(\mathbf{X}) - \tau \text{prox}_{\frac{1}{\tau} \bar{g}}(\mathbf{X}) \\ &= \frac{1}{D} \sum_{d=1}^D \lambda_d \phi(\mathbf{X}_{(d)}) - \frac{\tau}{D} \sum_{d=1}^D \text{prox}_{\bar{\lambda}_d \phi}(\mathbf{X}_{(d)}) \\ &\leq \frac{1}{D} \sum_{d=1}^D \sup_{\mathbf{X}_d} [\lambda_d \phi(\mathbf{X}_d) - \tau \text{prox}_{\bar{\lambda}_d \phi}(\mathbf{X}_d)] \\ &\leq \frac{1}{D} \sum_{d=1}^D \frac{\lambda_d^2 L^2}{2\tau}, \end{aligned}$$

where the second inequality comes from (27). Thus, we get the second inequality in the Lemma.  $\square$

Now, we prove Proposition 3.4.

*Proof.* First, we have

$$\begin{aligned} \min_{\mathbf{X}} F(\mathbf{X}) - \min_{\mathbf{X}} F_{\tau}(\mathbf{X}) &\geq \min_{\mathbf{X}} F(\mathbf{X}) - F_{\tau}(\mathbf{X}) \\ &= g(\mathbf{X}) - \bar{g}(\mathbf{X}) \geq 0. \end{aligned}$$

Let  $\mathbf{X}_1 = \arg \min_{\mathbf{X}} F(\mathbf{X})$  and  $\mathbf{X}_{\tau} = \arg \min_{\mathbf{X}} F_{\tau}(\mathbf{X})$ . Then, we have

$$\begin{aligned} \min_{\mathbf{X}} F(\mathbf{X}) - \min_{\mathbf{X}} F_{\tau}(\mathbf{X}) &= F(\mathbf{X}_1) - F_{\tau}(\mathbf{X}_{\tau}) \\ &\leq F(\mathbf{X}_{\tau}) - F_{\tau}(\mathbf{X}_{\tau}) \\ &= g(\mathbf{X}_{\tau}) - \bar{g}(\mathbf{X}_{\tau}) \\ &\leq \frac{L^2}{2\tau D} \sum_{d=1}^D \lambda_d^2. \end{aligned}$$

Thus,  $0 \leq \min F - \min F_{\tau} \leq \frac{L^2}{2\tau D} \sum_{d=1}^D \lambda_d^2$ .  $\square$

#### B.5. Theorem 3.5

First, we introduce the following Lemmas, which are basic properties for the proximal step.

**Lemma B.2** ((Parikh & Boyd, 2013)). *Let  $\tau > \rho + DL$  and  $\eta = \tau - \rho + DL$ . Then,*

$$F_{\tau}(\text{prox}_{\frac{1}{\tau} \bar{g}}(\mathbf{X})) \leq F_{\tau}(\mathbf{X}) - \frac{\eta}{2} \left\| \mathbf{X} - \text{prox}_{\frac{1}{\tau} \bar{g}}(\mathbf{X}) \right\|_F^2.$$

**Lemma B.3** ((Parikh & Boyd, 2013)). *If  $\mathbf{X} = \text{prox}_{\frac{1}{\tau} \bar{g}}(\mathbf{X} - \frac{1}{\tau} \nabla f(\mathbf{X}))$ , then  $\mathbf{X}$  is a critical point of  $F_{\tau}$ .*

**Lemma B.4** ((Hare & Sagastizábal, 2009)). *The proximal map  $\text{prox}_{\frac{1}{\tau} \bar{g}}(\mathbf{X})$  is continuous.*

Now, we prove Theorem 3.5.

*Proof.* Recall that  $\text{prox}_{\frac{1}{\tau} \bar{g}}(\mathbf{X}) = \frac{1}{D} \sum_{i=1}^D \text{prox}_{\frac{\lambda_i}{\tau} \phi}(\mathbf{X}_{(i)})$ . From Lemma B.2,

- If step 8 is performed, we have

$$\begin{aligned} F_\tau(\mathbf{X}_{t+1}) &\leq F_\tau(\mathbf{V}_t) - \frac{\eta}{2} \|\mathbf{X}_{t+1} - \mathbf{V}_t\|_F^2 \\ &\leq F_\tau(\mathbf{X}_t) - \frac{\eta}{2} \|\mathbf{X}_{t+1} - \mathbf{X}_t\|_F^2. \end{aligned} \quad (28)$$

- If step 6 is performed,

$$\begin{aligned} F_\tau(\mathbf{X}_{t+1}) &\leq F_\tau(\mathbf{V}_t) - \frac{\eta}{2} \|\mathbf{X}_{t+1} - \mathbf{V}_t\|_F^2 \\ &\leq F_\tau(\bar{\mathbf{X}}_t) - \frac{\eta}{2} \|\mathbf{X}_{t+1} - \bar{\mathbf{X}}_t\|_F^2 \\ &\leq F_\tau(\mathbf{X}_t) - \frac{\eta}{2} \|\mathbf{X}_{t+1} - \bar{\mathbf{X}}_t\|_F^2. \end{aligned} \quad (29)$$

Combining (28) and (29), we have

$$\begin{aligned} &\frac{2}{\eta} (F_\tau(\mathbf{X}_1) - F_\tau(\mathbf{X}_{T+1})) \\ &\geq \sum_{j \in \Omega_1(T)} \|\mathbf{X}_{t+1} - \bar{\mathbf{X}}_t\|_F^2 + \sum_{j \in \Omega_2(T)} \|\mathbf{X}_{t+1} - \mathbf{X}_t\|_F^2, \end{aligned} \quad (30)$$

where  $\Omega_1(T)$  and  $\Omega_2(T)$  are a partition of  $\{1, \dots, T\}$  such that when  $j \in \Omega_1(T)$  step 6 is performed, and when  $j \in \Omega_2(T)$  step 8 is performed.

As  $F_\tau$  is bounded from below and  $\lim_{\|\mathbf{X}\|_F \rightarrow \infty} F_\tau(\mathbf{X}) = \infty$ , taking  $T = \infty$  in (30), we have

$$\sum_{j \in \Omega_1(\infty)} \|\mathbf{X}_{t+1} - \bar{\mathbf{X}}_t\|_F^2 + \sum_{j \in \Omega_2(\infty)} \|\mathbf{X}_{t+1} - \mathbf{X}_t\|_F^2 = c,$$

where

$$c \leq \frac{2}{\eta} [F_\tau(\mathbf{X}_1) - F_\tau^{\min}]$$

is a positive constant. Thus, the sequence  $\{\mathbf{X}_t\}$  is bounded, and it must have limit points. Besides, one of the following three cases must hold.

1.  $\Omega_1(\infty)$  is finite,  $\Omega_2(\infty)$  is infinite. Let  $\mathbf{X}_*$  be a limit point of  $\{\mathbf{X}_t\}$ , and  $\{\mathbf{X}_{j_t}\}$  be a subsequence that converges to  $\mathbf{X}_*$ . In this case, on using Lemma B.4, we have

$$\begin{aligned} &\lim_{j_t \rightarrow \infty} \|\mathbf{X}_{j_t+1} - \mathbf{X}_{j_t}\|_F^2 \\ &= \lim_{j_t \rightarrow \infty} \left\| \text{prox}_{\frac{1}{\tau}\bar{g}}(\mathbf{X}_{j_t} - \frac{1}{\tau}\nabla f(\mathbf{X}_{j_t})) - \mathbf{X}_{j_t} \right\|_F^2 \\ &= \left\| \text{prox}_{\frac{1}{\tau}\bar{g}}(\mathbf{X}_* - \frac{1}{\tau}\nabla f(\mathbf{X}_*)) - \mathbf{X}_* \right\|_F^2 = 0. \end{aligned}$$

Thus,  $\mathbf{X}_* = \text{prox}_{\frac{1}{\tau}\bar{g}}(\mathbf{X}_* - \frac{1}{\tau}\nabla f(\mathbf{X}_*))$ , and  $\mathbf{X}_*$  is a critical point of  $F_\tau$  from Lemma B.3.

2.  $\Omega_1(\infty)$  is infinite,  $\Omega_2(\infty)$  is finite. Let  $\mathbf{X}_*$  be a limit point of  $\{\mathbf{X}_t\}$ , and  $\{\mathbf{X}_{j_t}\}$  be a subsequence that converges to  $\mathbf{X}_*$ . In this case, we have

$$\begin{aligned} &\lim_{j_t \rightarrow \infty} \|\mathbf{X}_{j_t+1} - \mathbf{Y}_{j_t}\|_F^2 \\ &= \lim_{j_t \rightarrow \infty} \left\| \text{prox}_{\frac{1}{\tau}\bar{g}}(\mathbf{X}_{j_t} - \frac{1}{\tau}\nabla f(\mathbf{X}_{j_t})) - \mathbf{Y}_{j_t} \right\|_F^2 \\ &= \left\| \text{prox}_{\frac{1}{\tau}\bar{g}}(\mathbf{X}_* - \frac{1}{\tau}\nabla f(\mathbf{X}_*)) - \mathbf{X}_* \right\|_F^2 = 0. \end{aligned}$$

Thus,  $\mathbf{X}_* = \text{prox}_{\frac{1}{\tau}\bar{g}}(\mathbf{X}_* - \frac{1}{\tau}\nabla f(\mathbf{X}_*))$ , and  $\mathbf{X}_*$  is a critical point of  $F_\tau$  from Lemma B.3.

3. Both  $\Omega_1(\infty)$  and  $\Omega_2(\infty)$  are infinite. From the above cases, we can see that either  $\Omega_1(\infty)$  or  $\Omega_2(\infty)$  is infinite, and limit points are also the critical points of  $F_\tau$ .

Thus, all limit points of  $\{\mathbf{X}_t\}$  are critical points of  $F_\tau$ .  $\square$

### B.6. Corollary 3.6

*Proof.* Since  $\mathbf{X}_{t+1} = \text{prox}_{\frac{1}{\tau}\bar{g}}(\mathbf{V}_t - \frac{1}{\tau}\nabla f(\mathbf{V}_t))$ , conclusion (i) directly follows from Lemma B.3.

From (30), we have

$$\begin{aligned} \min_{1, \dots, T} \|\mathbf{X}_{t+1} - \mathbf{V}_t\|_F^2 &\leq \frac{1}{T} \sum_{t=1, \dots, T} \|\mathbf{X}_{t+1} - \mathbf{V}_t\|_F^2 \\ &\leq \frac{2}{\eta T} (F_\tau(\mathbf{X}_1) - F_\tau(\mathbf{X}_{T+1})) \\ &\leq \frac{2}{\eta T} (F_\tau(\mathbf{X}_1) - F_\tau^{\min}). \end{aligned}$$

Thus, we obtain Conclusion (ii).  $\square$

### B.7. Theorem 3.7

We first bound  $\partial F_\tau$  in Lemma B.5.

**Lemma B.5.** For iterations in Algorithm 1, we have  $\min_{\mathbf{u}_t \in \partial F_\tau(\mathbf{X}_t)} \|\mathbf{u}_t\|_F \leq (\tau + \rho) \|\mathbf{X}_{t+1} - \mathbf{V}_t\|_F$ .

*Proof.* Since  $\mathbf{X}_{t+1}$  is generated from the proximal step, i.e.,  $\mathbf{X}_{t+1} = \text{prox}_{\frac{1}{\tau}\bar{g}}(\mathbf{V}_t - \frac{1}{\tau}\nabla f(\mathbf{V}_t))$ , from its optimality condition, we have

$$\mathbf{X}_{t+1} - \left( \mathbf{V}_t - \frac{1}{\tau}\nabla f(\mathbf{V}_t) \right) + \frac{1}{\tau}\partial\bar{g}(\mathbf{X}_{t+1}) \ni \mathbf{0}.$$

Let

$$\mathbf{u}_t = \tau [\mathbf{X}_{t+1} - \mathbf{V}_t] - [\nabla f(\mathbf{V}_t) - \nabla f(\mathbf{X}_{t+1})].$$

We have

$$\partial F_\tau(\mathbf{X}_{t+1}) = [\nabla f(\mathbf{X}_{t+1}) + \partial\bar{g}(\mathbf{X}_{t+1})] \in \mathbf{u}_t.$$

Table 8. Testing RMSE, CPU time and space required for the synthetic data, when  $I_3$  is small.

|                  |        | $\bar{c} = 50$ , sparsity:5.64% |                |                | $\bar{c} = 100$ , sparsity: 3.09% |                 |                |
|------------------|--------|---------------------------------|----------------|----------------|-----------------------------------|-----------------|----------------|
|                  |        | RMSE                            | space (MB)     | time (sec)     | RMSE                              | space (MB)      | time (sec)     |
| convex           | PA-APG | 0.0141±0.0012                   | 75.5±0.4       | 257.2±34.8     | 0.0149±0.0011                     | 302.4±0.1       | 2131.7±419.9   |
| (nonconvex)      | GDPAN  | <b>0.0103±0.0001</b>            | 42.4±2.5       | 64.4±29.5      | <b>0.0103±0.0001</b>              | 171.5±2.2       | 665.4±99.8     |
| capped- $\ell_1$ | sNORT  | <b>0.0103±0.0001</b>            | <b>2.3±0.1</b> | 7.1±4.5        | <b>0.0103±0.0001</b>              | <b>14.0±0.8</b> | 27.9±5.1       |
|                  | NORT   | <b>0.0103±0.0001</b>            | 3.1±0.1        | <b>2.1±1.4</b> | <b>0.0103±0.0001</b>              | 14.9±0.9        | <b>5.9±1.6</b> |
| (nonconvex)      | GDPAN  | <b>0.0103±0.0001</b>            | 41.8±2.4       | 59.1±26.4      | 0.0104±0.0001                     | 172.2±1.5       | 654.1±214.7    |
| LSP              | sNORT  | <b>0.0103±0.0001</b>            | <b>2.3±0.1</b> | 4.5±1.5        | 0.0104±0.0001                     | 14.4±0.1        | 27.9±5.7       |
|                  | NORT   | <b>0.0103±0.0001</b>            | <b>2.3±0.1</b> | <b>1.6±1.1</b> | 0.0104±0.0001                     | 15.1±0.1        | <b>5.8±2.8</b> |
| (nonconvex)      | GDPAN  | 0.0104±0.0001                   | 41.9±1.6       | 69.3±26.4      | 0.0104±0.0001                     | 172.1±1.6       | 615.0±140.9    |
| TNN              | sNORT  | 0.0104±0.0001                   | 2.5±0.1        | 6.6±3.8        | 0.0104±0.0001                     | 14.4±0.1        | 26.2±4.0       |
|                  | NORT   | 0.0104±0.0001                   | 2.5±0.1        | <b>1.4±0.3</b> | <b>0.0103±0.0001</b>              | 15.1±0.1        | <b>5.3±1.5</b> |

 Table 9. Testing RMSE, CPU time and space required for the synthetic data, when  $I_3$  is large.

|                     |        | $\hat{c} = 20$ , sparsity:4.77% |                 |                | $\hat{c} = 40$ , sparsity:2.70% |                 |                  |
|---------------------|--------|---------------------------------|-----------------|----------------|---------------------------------|-----------------|------------------|
|                     |        | RMSE                            | space (MB)      | time (sec)     | RMSE                            | space (MB)      | time (sec)       |
| convex              | PA-APG | 0.0110±0.0007                   | 600.8±70.4      | 250.1±59.6     | 0.0098±0.0001                   | 4804.5±598.2    | 6196.4±2033.4    |
| nonconvex           | GDPAN  | <b>0.0010±0.0001</b>            | 423.1±11.4      | 179.9±21.5     | <b>0.0006±0.0001</b>            | 3243.3±489.6    | 3670.4±225.8     |
| (capped- $\ell_1$ ) | sNORT  | <b>0.0010±0.0001</b>            | <b>10.1±0.1</b> | 22.9±1.1       | <b>0.0006±0.0001</b>            | <b>44.6±0.3</b> | 575.9±70.9       |
|                     | NORT   | <b>0.0009±0.0001</b>            | 14.4±0.1        | 5.1±0.3        | <b>0.0006±0.0001</b>            | 66.3±0.6        | 89.4±13.4        |
| nonconvex           | GDPAN  | <b>0.0010±0.0001</b>            | 426.9±9.7       | 177.8±16.4     | <b>0.0006±0.0001</b>            | 3009.3±376.2    | 3794.0±419.5     |
| (LSP)               | sNORT  | <b>0.0010±0.0001</b>            | 10.8±0.1        | 21.8±0.8       | <b>0.0006±0.0001</b>            | <b>44.6±0.2</b> | 544.2±75.5       |
|                     | NORT   | <b>0.0010±0.0001</b>            | 14.0±0.1        | <b>4.6±0.7</b> | <b>0.0006±0.0001</b>            | 62.1±0.5        | <b>81.3±24.9</b> |
| nonconvex           | GDPAN  | <b>0.0010±0.0001</b>            | 427.3±10.1      | 184.1±17.7     | <b>0.0006±0.0001</b>            | 3009.2±412.2    | 3922.9±280.1     |
| (TNN)               | sNORT  | <b>0.0010±0.0001</b>            | <b>10.2±0.1</b> | 21.8±0.9       | <b>0.0006±0.0001</b>            | <b>44.7±0.2</b> | 554.7±44.1       |
|                     | NORT   | <b>0.0010±0.0001</b>            | 14.4±0.2        | <b>4.8±0.4</b> | <b>0.0006±0.0001</b>            | 63.1±0.6        | <b>78.0±9.4</b>  |

Thus,

$$\begin{aligned} \|\mathbf{u}_t\|_F &\leq \tau \|\mathbf{x}_{t+1} - \mathbf{v}_t\|_F + \|\nabla f(\mathbf{v}_t) - \nabla f(\mathbf{x}_{t+1})\|_F \\ &\leq (\tau + \rho) \|\mathbf{x}_{t+1} - \mathbf{v}_t\|_F. \end{aligned}$$

Moreover, from Lemma B.2, we have

$$\|\mathbf{x}_{t+1} - \mathbf{v}_t\|_F^2 \leq \frac{2}{\eta} [F_\tau(\mathbf{v}_t) - F_\tau(\mathbf{x}_{t+1})]. \quad (32)$$

□ Let  $r_t = F_\tau(\mathbf{x}_t) - F_\tau^{\min}$ , we have

$$\begin{aligned} r_t - r_{t+1} &= F_\tau(\mathbf{x}_t) - F_\tau^{\min} - [F_\tau(\mathbf{x}_{t+1}) - F_\tau^{\min}] \\ &\geq F_\tau(\mathbf{v}_t) - F_\tau^{\min} - [F_\tau(\mathbf{x}_{t+1}) - F_\tau^{\min}] \\ &= F_\tau(\mathbf{v}_t) - F_\tau(\mathbf{x}_{t+1}). \end{aligned} \quad (33)$$

Now, we prove Theorem 3.7.

*Proof.* From Theorem 3.5, we have

$$\lim_{T \rightarrow \infty} F_\tau(\mathbf{x}_t) = F_\tau^{\min}.$$

Then, from Lemma B.5, we have

$$\lim_{t \rightarrow \infty} \min_{\mathbf{u}_t \in \partial F_\tau(\mathbf{x}_t)} \|\mathbf{u}_t\|_F \leq \lim_{t \rightarrow \infty} (\tau + \rho) \|\mathbf{x}_{t+1} - \mathbf{v}_t\|_F = 0.$$

Thus, for any  $\epsilon, c > 0$  and  $t > t_0$  where  $t_0$  is a sufficiently large positive integer, we have

$$\begin{aligned} \mathbf{x}_t \in \{\mathbf{x} \mid \min_{\mathbf{u} \in \partial F_\tau(\mathbf{x})} \|\mathbf{u}\|_F \leq \epsilon, \\ F_\tau^{\min} < F_\tau(\mathbf{x}) < F_\tau^{\min} + c\}. \end{aligned}$$

Then, the uniformized KL property implies for all  $t \geq t_0$ ,

$$\begin{aligned} 1 &\leq \psi'(F_\tau(\mathbf{x}_{t+1}) - F_\tau^{\min}) \min_{\mathbf{u}_t \in \partial F_\tau(\mathbf{x}_t)} \|\mathbf{u}_t\|_F \\ &= \psi'(F_\tau(\mathbf{x}_{t+1}) - F_\tau^{\min}) (\tau + \rho) \|\mathbf{x}_{t+1} - \mathbf{v}_t\|_F. \end{aligned} \quad (31)$$

Combine (31), (32) and (33), we have

$$\begin{aligned} 1 &\leq [\psi'(r_t)]^2 (\tau + \rho)^2 \|\mathbf{x}_{t+1} - \mathbf{v}_t\|_F^2 \\ &\leq [\psi'(r_t)]^2 \frac{2(\tau + \rho)^2}{\eta} [F_\tau(\mathbf{v}_t) - F_\tau(\mathbf{x}_{t+1})] \\ &\leq \frac{2(\tau + \rho)^2}{\eta} [\psi'(r_{t+1})]^2 (r_t - r_{t+1}). \end{aligned} \quad (34)$$

Since  $\phi(\alpha) = \frac{C}{\beta} \alpha^\beta$ , then  $\phi'(\alpha) = C \alpha^{\beta-1}$ , (34) becomes

$$1 \leq d_1 C^2 r_{t+1}^{2\beta-2} (r_t - r_{t+1}),$$

where  $d_1 = \frac{2(\tau+\rho)^2}{\eta}$ . Finally, it is shown in (Bolte et al., 2014; Li & Lin, 2015; Li et al., 2017) that the sequence  $\{r_t\}$  satisfying the above inequality, convergence to zero with different rates stated in the Theorem. □

Table 10. Algorithms compared on the real-world data sets.

|               | algorithm                        | model                           | basic solver                                        |
|---------------|----------------------------------|---------------------------------|-----------------------------------------------------|
| convex        | ADMM (Boyd et al., 2011)         | overlapped nuclear norm         | ADMM                                                |
|               | FaLRTC (Liu et al., 2013)        |                                 | Accelerated proximal algorithm for the dual problem |
|               | PA-APG (Yu, 2013)                |                                 | Accelerated PA algorithm                            |
|               | FFW (Guo et al., 2017)           | latent nuclear norm             | efficient Frank-Wolfe algorithm                     |
|               | TR-MM (Nimishakavi et al., 2018) | squared latent nuclear norm     | solved in dual with Riemannian optimization         |
|               | TenNN (Zhang & Aeron, 2017)      | tensor-SVD                      | ADMM                                                |
| factorization | RP (Kasai & Mishra, 2016)        | Turker decomposition            | Riemannian preconditioning                          |
|               | TMac (Xu et al., 2013)           | multiple matrices factorization | alternative minimization                            |
|               | CP-WOPT (Acar et al., 2011)      | CP decomposition                | gradient descent                                    |
|               | TMac-TT (Bengua et al., 2017)    | tensor-train decomposition      | alternative minimization                            |
| nonconvex     | GDPAN (Zhong & Kwok, 2014)       | nonconvex overlapped            | nonconvex PA algorithm                              |
|               | NORT (Algorithm 1)               | regularization                  | proposed algorithm                                  |

## C. Experimental Details

### C.1. Computation of $P_\Omega(\mathcal{X} - \mathcal{O})$

Using (17), each observed element in  $P_\Omega(\mathcal{X}_t - \mathcal{O})$  can be obtained by using Algorithm 2.

**Algorithm 2** Computing the  $p$ th element in  $P_\Omega(\mathcal{X}_t - \mathcal{O})$ .

**Require:** index  $\{i_p^1, i_p^2, i_p^3\}$ , factorizations of  $\mathbf{Y}_t^1, \mathbf{Y}_t^2, \mathbf{Y}_t^3$ ;

- 1:  $\mathbf{u}_1 \leftarrow$  the  $i_p^1$ th row of  $\mathbf{U}_t^1$ ;
- 2:  $\mathbf{v}_1 \leftarrow$  the  $(i_p^2 I_2 + i_p^3)$ th row of  $\mathbf{V}_t^1$ ;
- 3:  $\mathbf{u}_2 \leftarrow$  the  $i_p^2$ th row of  $\mathbf{U}_t^2$ ;
- 4:  $\mathbf{v}_2 \leftarrow$  the  $(i_p^3 I_3 + i_p^1)$ th row of  $\mathbf{V}_t^2$ ;
- 5: **if**  $D=3$  **then**
- 6:    $\mathbf{u}_3 \leftarrow$  the  $i_p^3$ th row of  $\mathbf{U}_t^3$ ;
- 7:    $\mathbf{v}_3 \leftarrow$  the  $(i_p^1 I_1 + i_p^2)$ th row of  $\mathbf{V}_t^3$ ;
- 8: **end if**
- 9:  $o_p \leftarrow$   $p$ th element in  $P_\Omega(\mathcal{O})$ ;

**output**  $v_p = \sum_{i=1}^D \alpha_i \mathbf{u}_i^\top \mathbf{v}_i - o_p$ .

### C.2. Color Images

The color images used in Section 4.2.1 are shown in Figure 6.

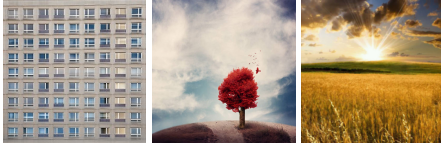

(a) windows. (b) tree. (c) rice.

Figure 6. Color images used in the experiments. All are of size  $1000 \times 1000 \times 3$ .

### C.3. Remote Sensing Data

The hyper-spectral images used in Section 4.2 are shown in Figure 7. The *Female* images are downloaded from <http://www.imageval.com/scene-database-4-faces-3-meters/>,

while the *Cabbage* and *Scene* images are from <https://sites.google.com/site/hyperspectralcolorimaging/dataset>.

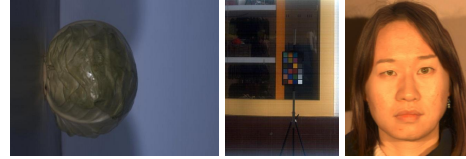

(a) Cabbage. (b) Scene. (c) Female.

Figure 7. Hyperspectral images used in the experiment. Images are of size  $1312 \times 432 \times 49$ ,  $1312 \times 951 \times 49$  and  $592 \times 409 \times 148$  respectively.
